# Supplementary material for: PRRT2 modulates presynaptic Ca2+ influx by interacting with P/Q-type channels
Source: PubMed Central journal article supplement — Cell Rep. 2021 Jun 15;35(11):109248. doi: 10.1016/j.celrep.2021.109248 (PMC8220258; doi:10.1016/j.celrep.2021.109248), 2021-06-15
Supplement: mmc1.pdf [file mmc1.pdf]

**Supplemental information**

**PRRT2 modulates presynaptic  $\text{Ca}^{2+}$  influx  
by interacting with P/Q-type channels**

**Daniele Ferrante, Bruno Sterlini, Cosimo Prestigio, Antonella Marte, Anna Corradi, Franco Onofri, Giorgio Tortarolo, Giuseppe Vicidomini, Andrea Petretto, Jessica Muià, Agnes Thalhammer, Pierluigi Valente, Lorenzo A. Cingolani, Fabio Benfenati, and Pietro Baldelli**

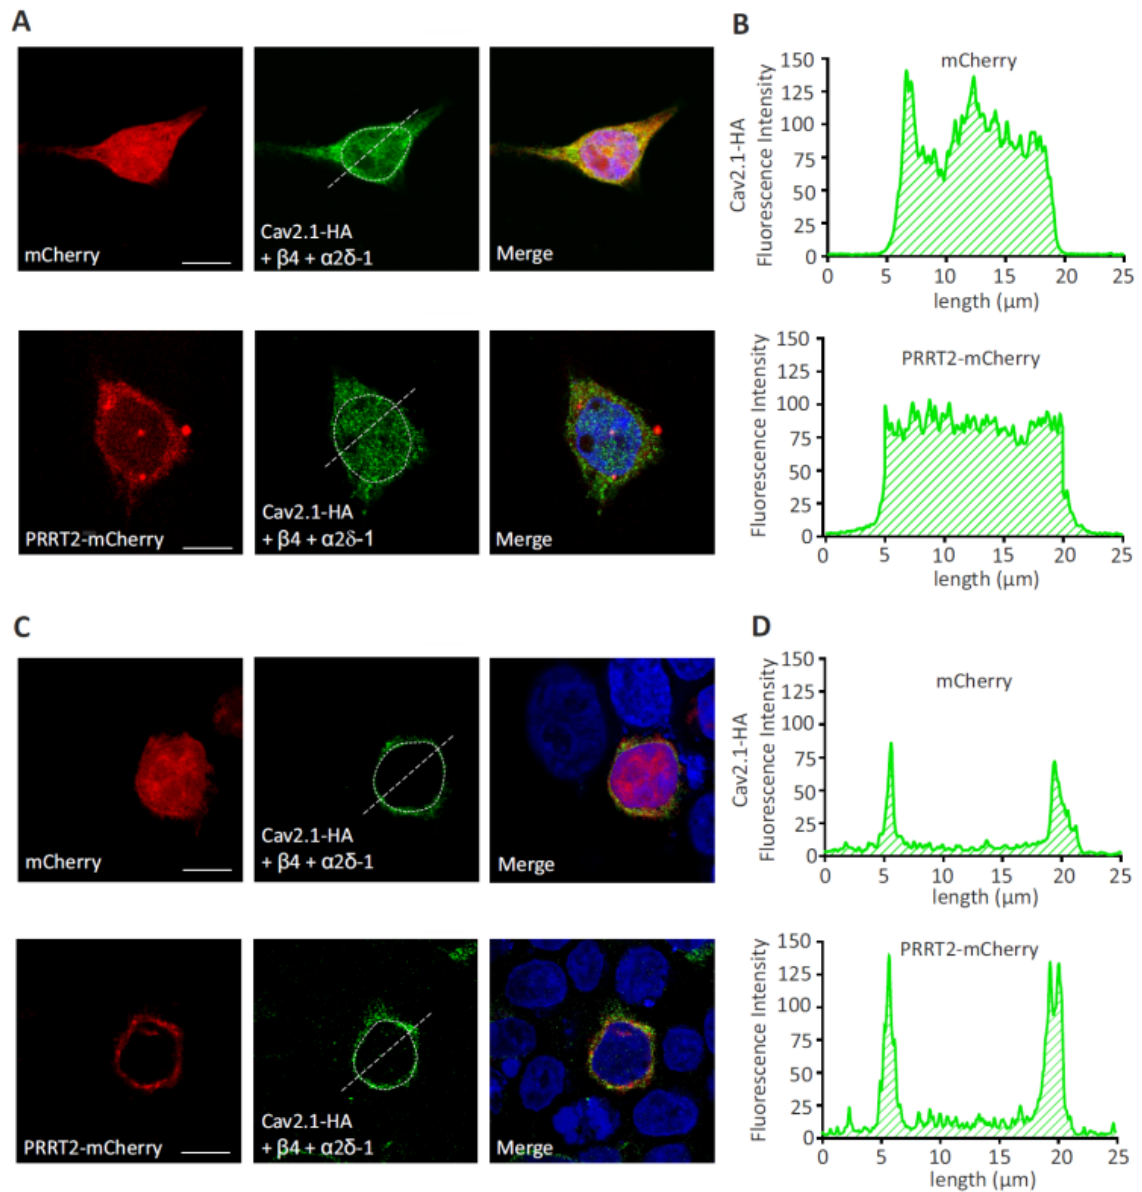

**Figure S1. Cav2.1-HA immunostaining in permeabilized and non-permeabilized HEK293 cells. [Related to Figure 4]**

**A.** Representative fluorescence images of permeabilized HEK293 cells transiently co-transfected with Cav2.1-HA/ $\alpha 2\delta$ -1/ $\beta 4$  and either mCherry or PRRT2-mCherry (red) and retrospectively stained with anti-HA antibody (green). The white line, corresponding to the major axis of the cell, was used to measure the fluorescence intensity of Cav2.1-HA immunostaining. **B.** Intensity profiles of Cav2.1-HA fluorescence in HEK293 cells expressing either mCherry (upper panel) or PRRT2-mCherry (lower panel). **C.** Representative fluorescence images of non-permeabilized HEK293 cells treated and analyzed as described in panel as in A. **D.** Intensity profiles of Cav2.1-HA fluorescence in HEK293 cells expressing either mCherry (upper panel) or PRRT2-mCherry (lower panel). Scale bar, 10  $\mu\text{m}$ .

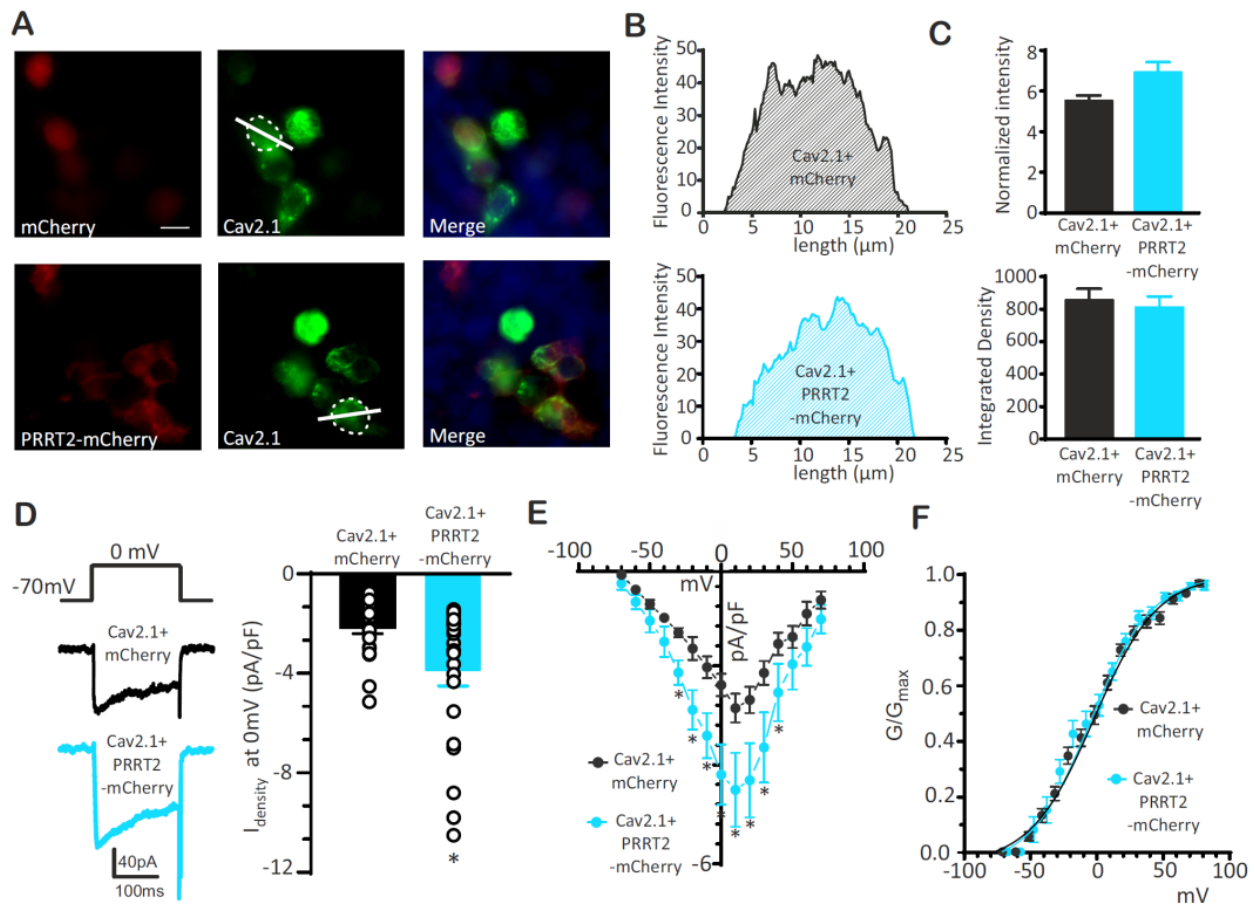

**Figure S2. Expression of exogenous PRRT2 increases P/Q-type  $\text{Ca}^{2+}$  currents in HEK293 cells expressing the Cav2.1 subunit. [Related to Figure 4]**

**A.** Representative fluorescence images of HEK293 cells transiently co-transfected with the Cav2.1 subunit and either mCherry alone or PRRT2-mCherry (red) and retrospectively stained with Cav2.1-specific antibodies (green). The white line, corresponding to the major axis of the cell, was used to measure the fluorescence intensity of Cav2.1 immunostaining. Scale bar, 10  $\mu\text{m}$ . **B.** Intensity profiles of Cav2.1 fluorescence along the major cell axis in HEK293 cells expressing either mCherry (grey area) or PRRT2-mCherry (light blue area). **C.** Normalized mean fluorescence intensity (top;  $n=48$  and 45 cells for mCherry and PRRT2-mCherry, respectively) and integrated fluorescence density (bottom;  $n=52$  and 42 cells for mCherry and PRRT2-mCherry, respectively) of Cav2.1 immunoreactivity in HEK293 cells expressing either mCherry (black bars) or PRRT2-mCherry (light blue bars). No PRRT2-induced changes in Cav2.1 expression were observed. Data are means  $\pm$  sem. **D. Left:** Representative traces of voltage-gated  $\text{Ca}^{2+}$  currents evoked by a 200-ms voltage step at 0 mV ( $V_h = -70$  mV) 2 days after HEK293 cell transfection with Cav2.1 and either mCherry alone (black) or PRRT2-mCherry (light blue) constructs. **Right:** Individual data and means  $\pm$  sem of current density ( $I_{\text{density}}$ ) values recorded in HEK293 cells expressing Cav2.1 (black) or Cav2.1/PRRT2 (light blue). **E.**  $I_{\text{density}}$  vs voltage (V) relationships for HEK293 cells expressing Cav2.1 (black) or Cav2.1/PRRT2 (light blue). **F.** Normalized conductance-voltage curves of HEK293 cells expressing Cav2.1 (black) or Cav2.1/PRRT2 (light blue). Curves were fitted to the Boltzmann equation. \* $p < 0.05$ , \*\* $p < 0.01$ , unpaired Student's  $t$ -test/Mann-Whitney's  $U$ -test ( $n=19$  for both mCherry- and PRRT2-mCherry infected neurons;  $n=25$  and 23 for Cav2.1- or Cav2.1/PRRT2-expressing HEK293 cells).

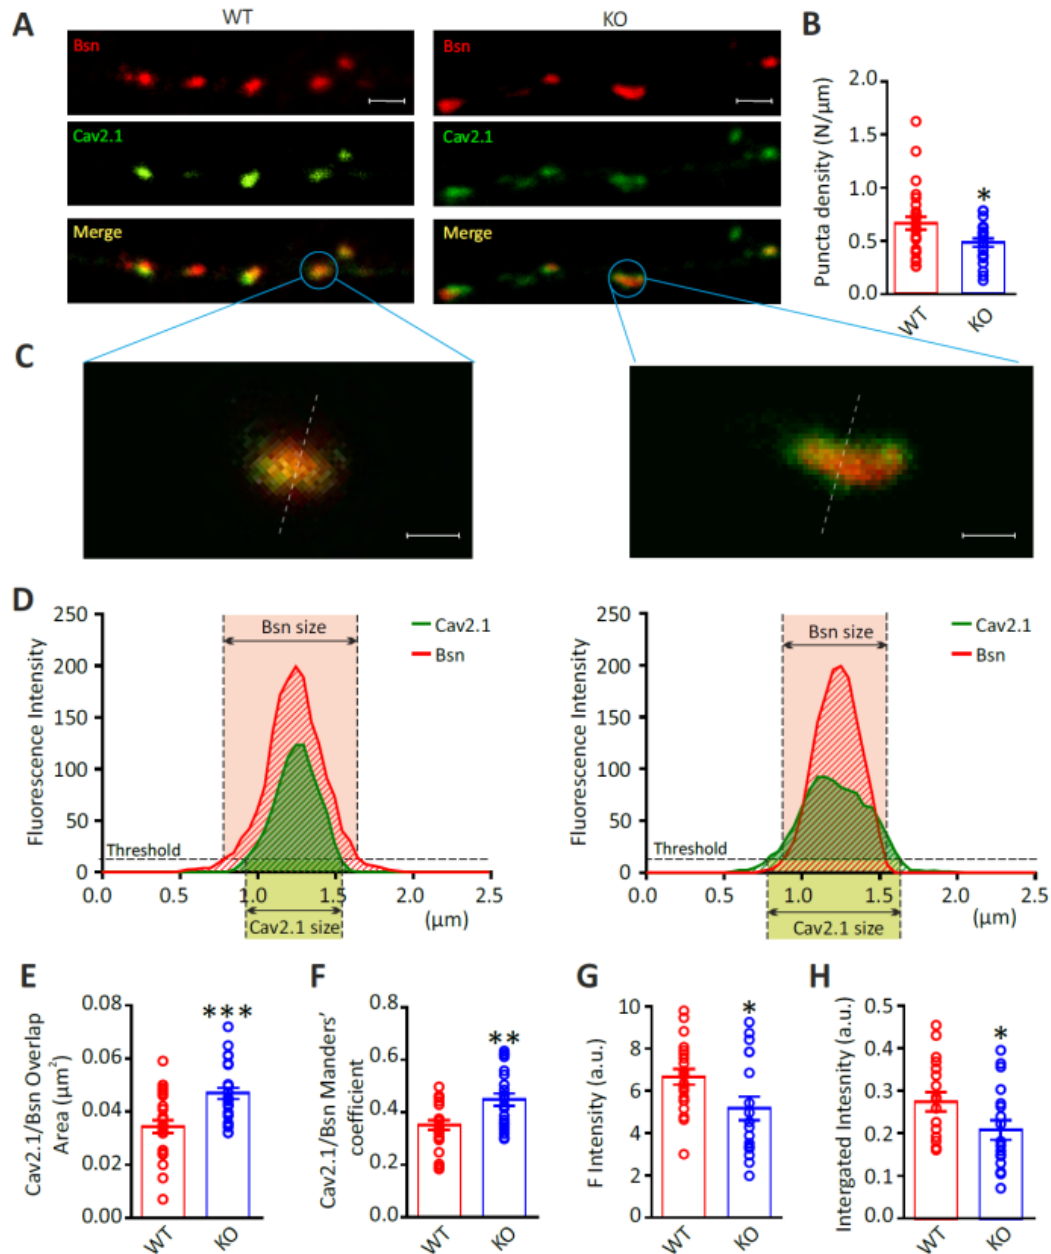

**Figure S3. Image scanning microscopy (ISM) confirming the dispersion of P/Q-type  $\text{Ca}^{2+}$  channels in PRRT2-deficient presynaptic terminals. [Related to Figure 6]**

**A.** Representative ISM images of synaptic contacts from 14 DIV primary hippocampal neurons. Double-immunostaining for Bassoon (Bsn; red) and Cav2.1 (green) was used to analyze the localization of Cav2.1 at Bsn-labeled presynaptic boutons in WT (left) and PRRT2 KO (right) hippocampal neurons. Merge panels identify synaptic puncta in which Bsn and Cav2.1 colocalize (yellow). Scale bar, 1  $\mu$ m. **B.** Quantification of the mean ( $\pm$  sem) linear density (puncta/ $\mu$ m) of double-stained synaptic boutons in WT (n=14) and PRRT2 KO (n=15) neurons, each from n=2 independent neuronal preparations. Individual values are superimposed. **C, D.** Representative zoomed detail of single WT (left) and PRRT2 KO (right) synaptic boutons where Bsn and Cav2.1 stainings colocalize (C; scale bar, 0.25  $\mu$ m) and the corresponding distribution profile (D) of the immunofluorescence intensity of Cav2.1 (green) and Bsn (red). **E-H.** Quantitative analysis of the area of the Cav2.1 immunoreactivity (E), Manders' coefficient (F), mean (G) and integrated (H) fluorescence intensities of Cav2.1 measured within Bsn-positive areas. Means ( $\pm$  sem) are shown with superimposed individual values. \* $p < 0.05$ , \*\* $p < 0.01$ , \*\*\* $p < 0.001$ , Student's  $t$ -test (n=14 and 15 for WT and PRRT2 KO neurons, respectively, from n=2 independent neuronal preparations).
